# Supplementary material for: Consumption of Cooked Black Beans Stimulates a Cluster of Some Clostridia Class Bacteria Decreasing Inflammatory Response and Improving Insulin Sensitivity
Source: Nutrients. 2020 Apr 23;12(4):1182. doi: 10.3390/nu12041182 (PMC7230233; doi:10.3390/nu12041182)
Supplement: Supplementary file 1 [file nutrients-12-01182-s001.pdf]

**Table S1.** Dry cooked black beans composition.

| Nutrient         | g/100 g dry cooked black beans |
|------------------|--------------------------------|
| Protein          | 17.82                          |
| Lipids           | 1.12                           |
| Dietary fiber    | 17.27                          |
| Carbohydrates    | 55.56                          |
| Resistant starch | 3.49                           |

\*Results expressed in 100g dry basis. AOAC proximal chemical method. %humidity:  
4.89%

**A**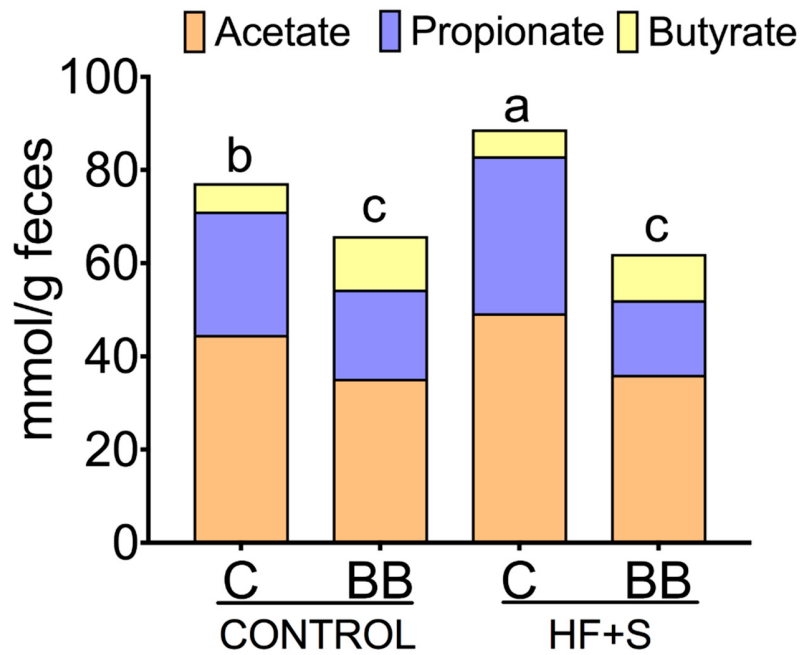**B**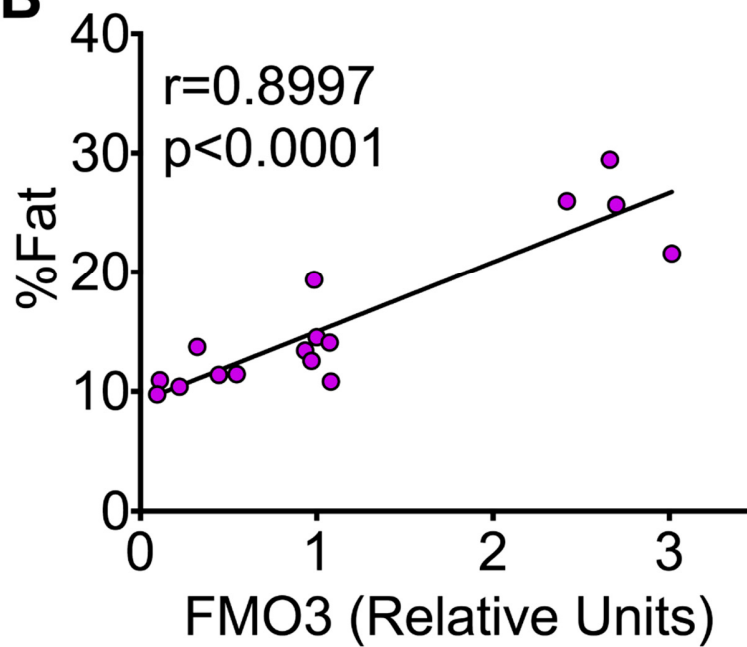

**Figure S1.** Total SCFA. (A) Fecal total short chain fatty acids, (B) Correlation between % Body fat mass and flavin monooxygenase-3 (FMO3).
